# Supplementary material for: Molecular analysis of the emergence of pandemic Vibrio parahaemolyticus
Source: PubMed Central journal article supplement (PMC2491623; doi:10.1186/1471-2180-8-110), 2008-06-30

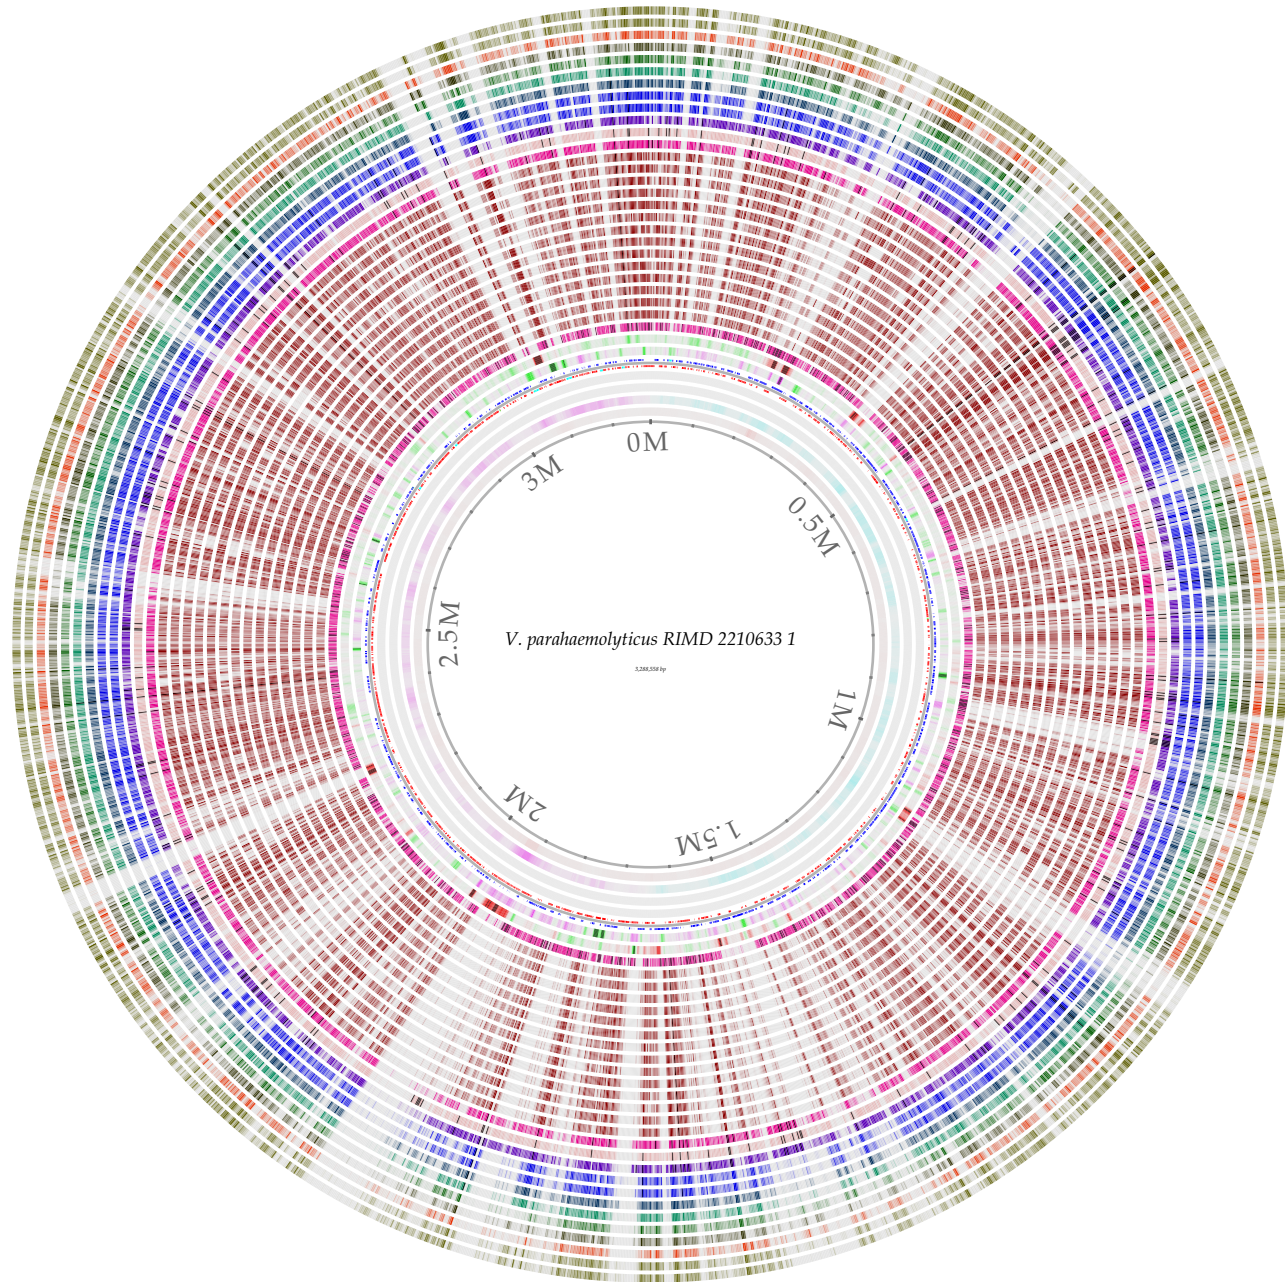

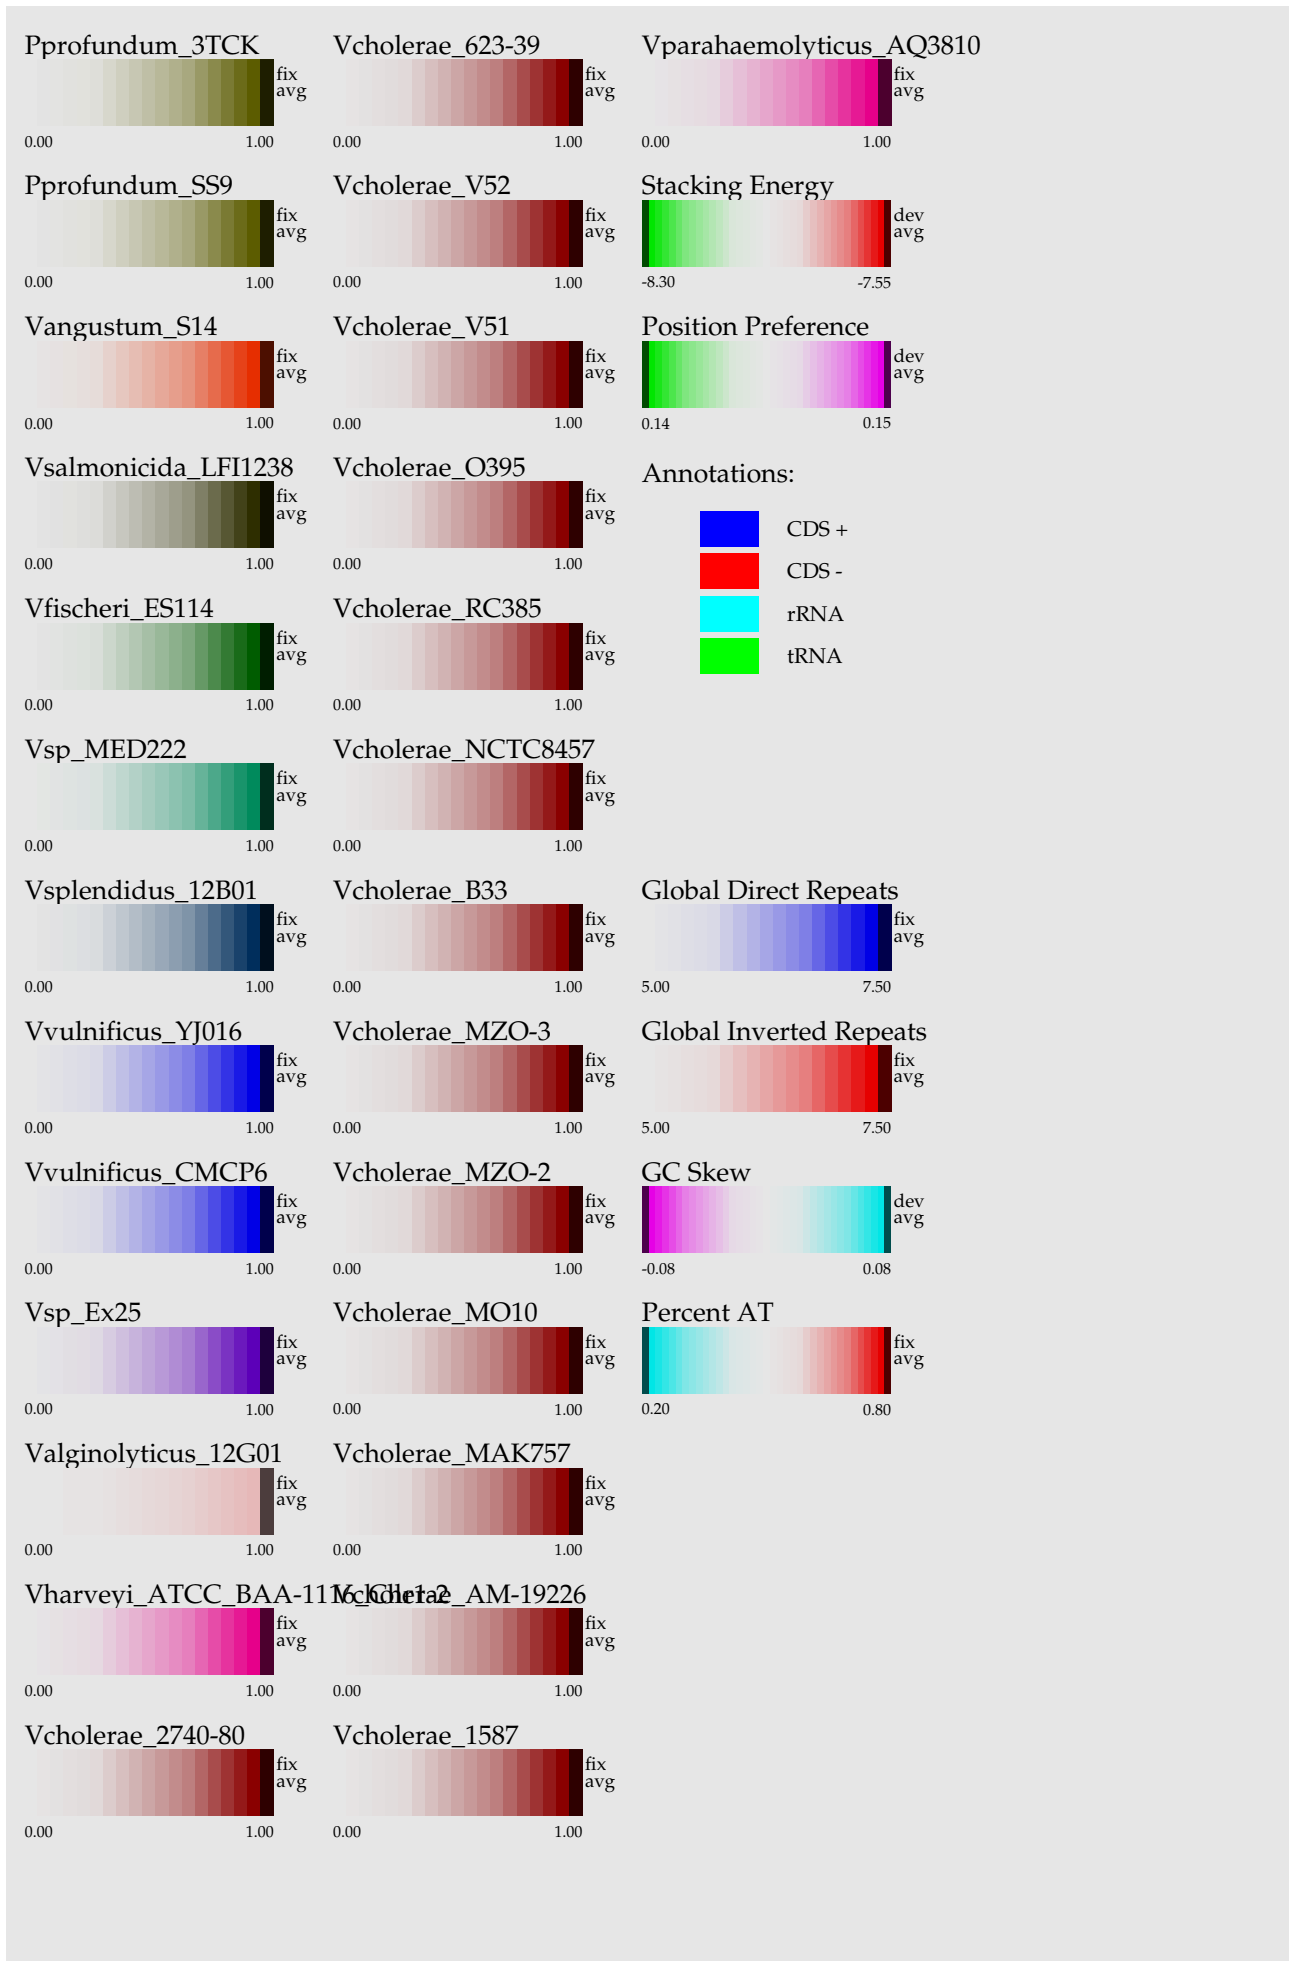

Supplement: 1471-2180-8-110-S1.pdf [file 1471-2180-8-110-S1.pdf]
